# Supplementary material
Source: PubMed Central journal article supplement (PMC6704464)
Supplement: fj.201802519R.sd1.pdf [file fj.201802519R.sd1.pdf]

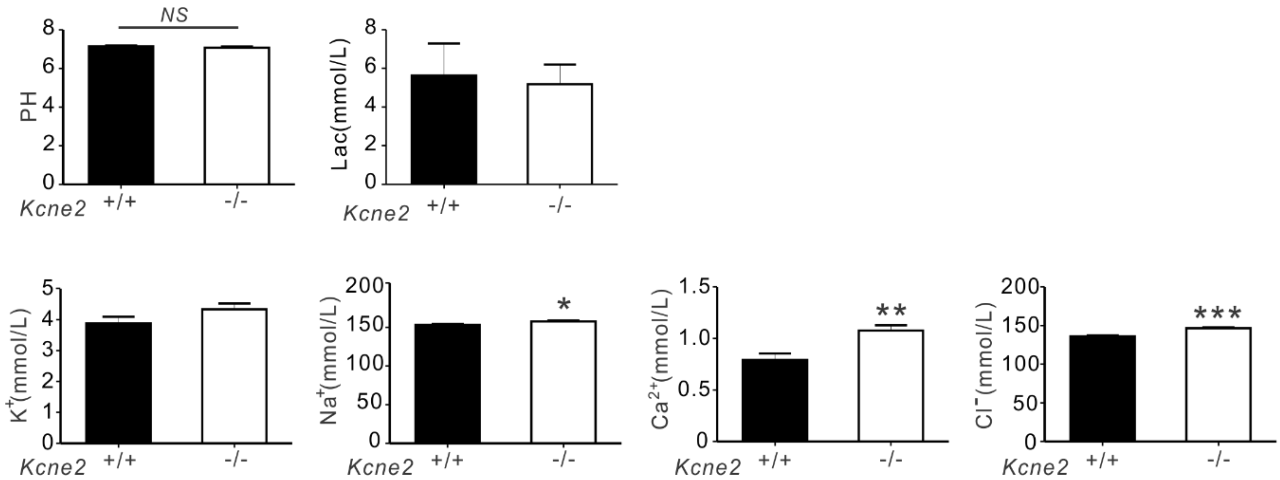

### Supplementary Figure 1

Comparison of blood parameters for *Kcne2*<sup>+/+</sup> and *Kcne2*<sup>-/-</sup> mice at baseline;

*n* = 6-7, \**P*<0.05, \*\**P*<0.01, \*\*\**P*<0.001, compared with *Kcne2*<sup>+/+</sup> mice.

| Parameter                                                                       | Score per field |       |     |
|---------------------------------------------------------------------------------|-----------------|-------|-----|
|                                                                                 | 0               | 1     | 2   |
| <b>A</b> Number of neutrophils in the alveolar space                            | None            | 1-5   | >5  |
| <b>B</b> Number of neutrophils in the interstitial space                        | None            | 1-5   | >5  |
| <b>C</b> Formation of hyaline membranes                                         | None            | 1     | >1  |
| <b>D</b> Presence of proteinaceous debris in the alveolar space                 | None            | 1     | >1  |
| <b>E</b> Thickening of the alveolar wall                                        | <2x             | 2x-4x | >4x |
| <b>Overall score</b> = [(20×A)+(14×B)+(7×C)+(7×D)+(2×E)]/(number of fields×100) |                 |       |     |

### Supplementary Table 1. Quantitative histological evaluation of lung injury.

According to criteria issued by the American Thoracic Society (32), to identify the lung injury caused by *Kcne2* deletion, we used the above lung injury scoring system to measure 30 successive random high-power fields (400 × total magnification) in a blinded fashion.
